# Supplementary material
Source: PubMed Central journal article supplement (PMC299882)

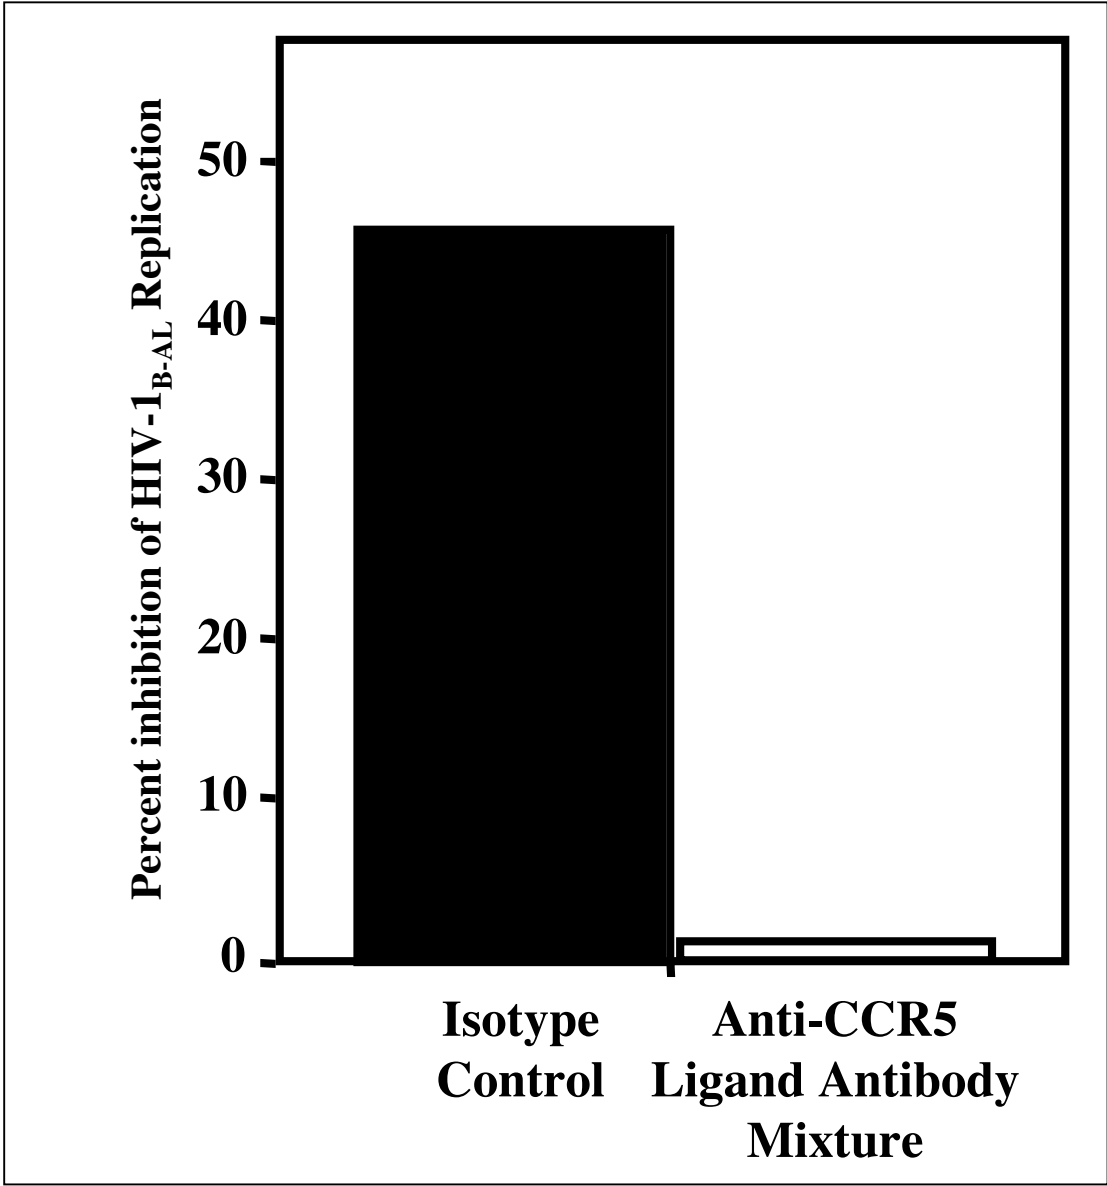

Supplement: pnas_100_25_15006__3.pdf [file pnas_100_25_15006__3.pdf]
